# Supplementary material
Source: PubMed Central journal article supplement (PMC4371968)
Supplement: pnas.201424341SI.pdf [file pnas.201424341SI.pdf]

# Supporting Information

Di Pilato et al. 10.1073/pnas.1424341112

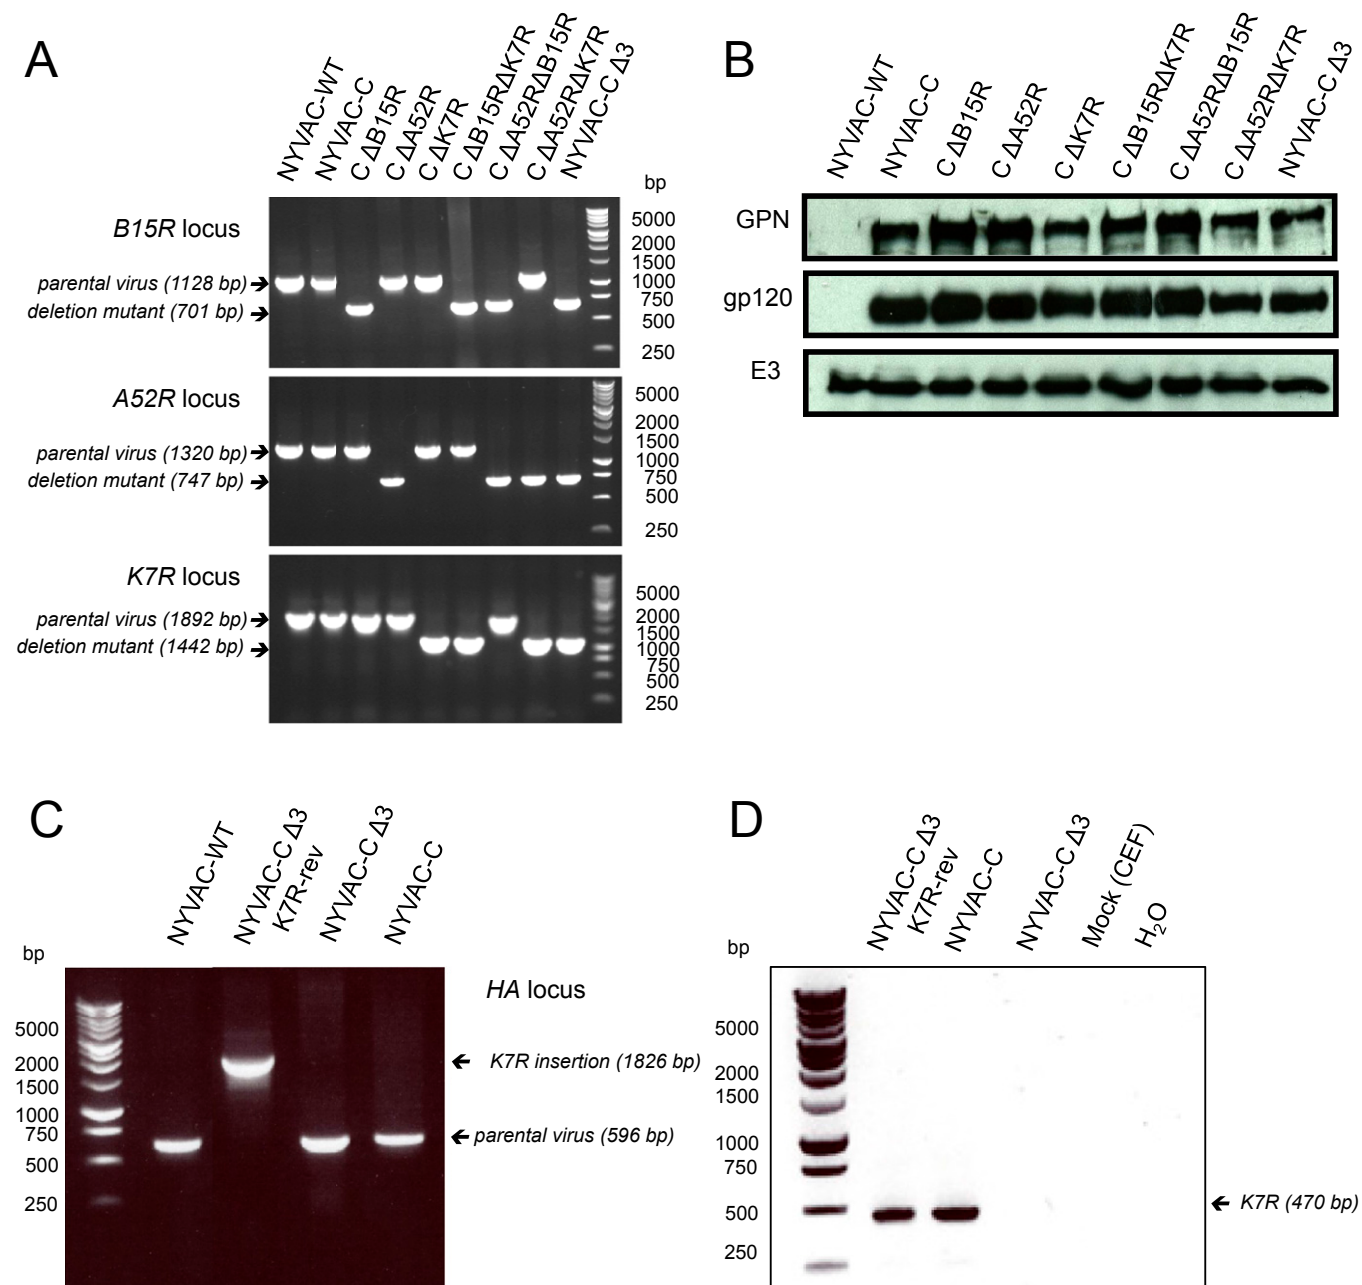

**Fig. S1.** Generation and characterization of NYVAC-C mutants. (A) PCR analysis to confirm A52R, B15R, and K7R gene deletion. Viral DNA was extracted from BSC-40 cells infected with the viruses as indicated (2 PFUs per cell, 24 h). (B) Western blot showing expression of HIV-1 antigens and E3 VACV protein in BSC-40 cells infected as in A. (C) PCR analysis to confirm K7R gene insertion. Viral DNA was extracted from BSC-40 cells infected with the viruses as indicated (1 PFU per cell, 24 h). (D) RT-PCR analysis to confirm K7R gene expression. RNA was extracted from CEF cells infected with the viruses as indicated (1 PFU per cell, 24 h).

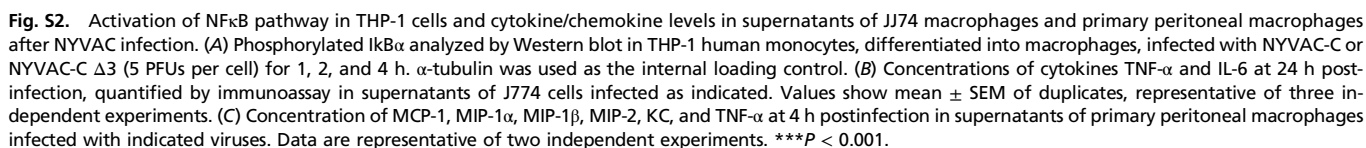

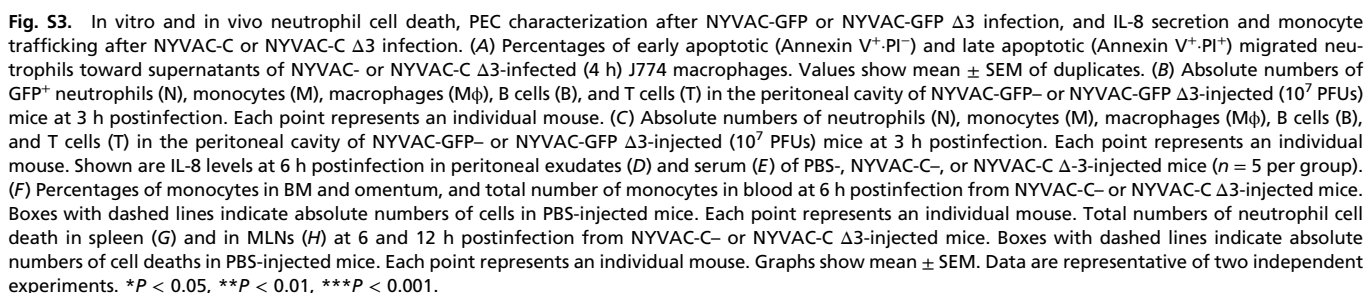

4 of 6

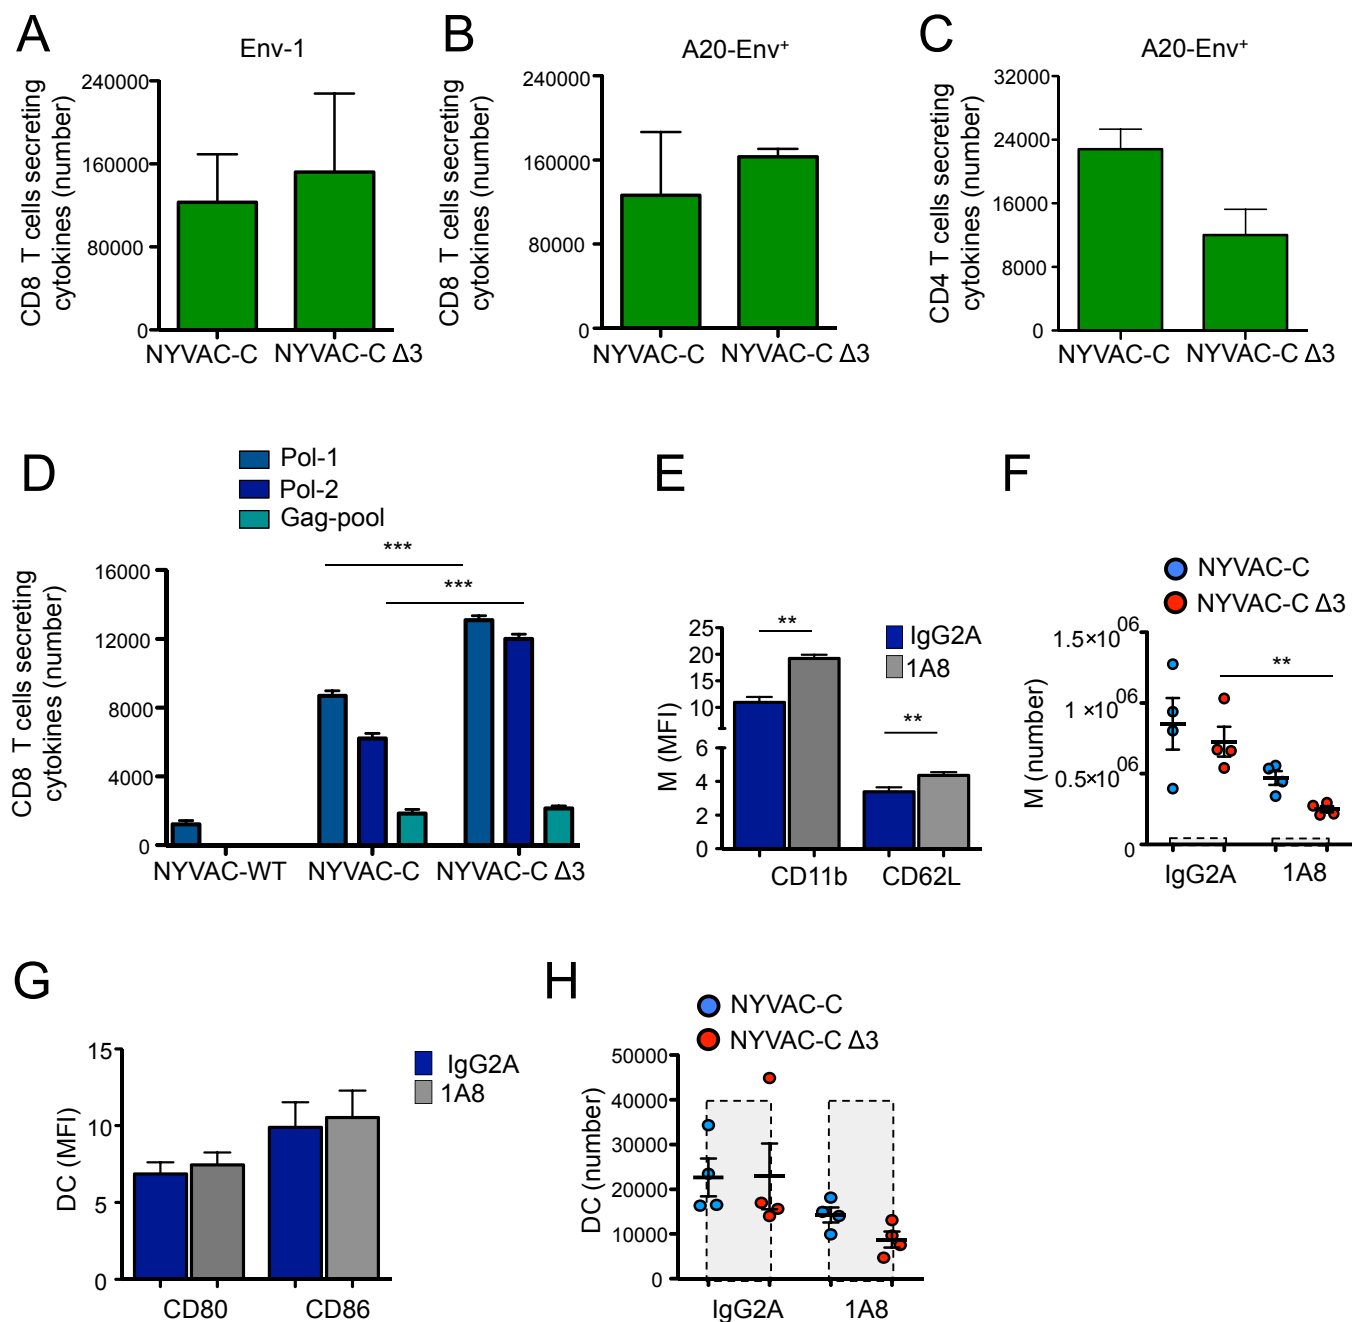

**Fig. S5.** Magnitude of the specific CD8 and CD4 T-cell response to HIV-1 antigens, and M or DC activation and absolute numbers in 1A8-pretreated/NYVAC-infected mice. Shown is the vaccine-induced HIV-1-specific T-cell response in mice ( $n = 4$  per group) infected with  $10^7$  PFUs of NYVAC-C or NYVAC-C  $\Delta 3$ . The response was measured 11 d after the last i.p. immunization, after stimulation of splenocytes with Env-1 peptide (A) or with A20 Env<sup>+</sup> (B and C), or after the last intramuscular immunization and after stimulation of splenocytes with HIV-1 peptides/pools (D). Total value (magnitude) is the sum of percentages of CD8 or CD4 T cells per spleen that secrete IFN- $\gamma$  and/or TNF- $\alpha$  and/or IL-2 and/or CD107a. Values show mean  $\pm$  SEM of two independent experiments. Shown are the MFIs of indicated markers in monocytes (M) (E) and in DCs (G) at 6 h postinfection in NYVAC-injected and IgG2A- or 1A8-pretreated mice. Also shown are M (F) and DC (H) absolute numbers at 6 h postinfection in NYVAC-injected and IgG2A- or 1A8-pretreated mice. Boxes with dashed lines indicate numbers in PBS-injected mice. Graphs show mean  $\pm$  SEM; each point represents an individual mouse. \*\* $P < 0.01$ , \*\*\* $P < 0.001$ .
